# Supplementary material
Source: publisher figshare collection journal article supplement (https://karger.figshare.com/ndownloader/files/35905082)
Supplement: Supplementary file 1 [file 35905082]

Supplementary Table

Patient characteristics of all treatment cases (2344)

|  |  | Male n=1298 (55%)  n/N (%) | Female n=1046 (45%)  n/N (%) | p |
| --- | --- | --- | --- | --- |
| Median (range) PC in BM (n=1662, male = 916, female = 746) |  | 45 (1-97) | 50 (1-100) | 0.001 |
| Median (range) Paraprotein (g/dL) (n=1475, male =812, female = 663) |  | 34.4 (0.2-62) | 37.3 (1.64-44.2) | 0.168 |
| Median (range) Hb mmol/l (n=1839, male = 969, female = 879) |  | 6.9 (3.4-11.8) | 6.5 (3.4-10.5) | <0.001 |
| Anaemia |  |  |  |  |
|  | no anaemia | 293/969 (30%) | 215/879 (25%) | <0.001 |
|  | mild (11-12g/dl) | 230/969 (24%) | 157/879 (18%) | <0.001 |
|  | moderate (8-11g/dl) | 407/969 (42%) | 447/879 (51%) | <0.001 |
|  | severe (<8g/dl) | 39/969 (4%) | 51/879 (6%) | <0.001 |
| Bone lesions | none | 151/1284 (12%) | 138/1040 (13%) | 0.272 |
|  | ≤2 | 71/1284 (6%) | 71/1040 (7%) |
|  | >2 | 1062/1284 (83%) | 831/1040 (80%) |
| Therapy for MM |  | 1237/1298 (95%) | 997/1046 (95%) | 0.947 |
| Median number of cycles of therapy |  | 2 (1-96) | 2 (1-45) | 0.542 |
| Therapy intensity | induction | 393/1237 (32%) | 300/997 (30%) | 0.288 |
|  | mobilisation | 189/1237 (15%) | 143/997 (14%) |
|  | high dose | 251/1237 (20%) | 188/997 (19%) |
|  | long term | 376/1237 (31%) | 347/997 (35%) |
|  | consolidation | 28/1237 (2%) | 19/997 (2%) |
| Type of therapy | conventional | 355/1228 (29%) | 277/990 (28%) | 0.617 |
|  | PI | 344/1228 (28%) | 313/990 (32%) |
|  | IMiDs | 187/1228 (15%) | 141/990 (14%) |
|  | PI+IMiDs | 37/1228 (3%) | 29/990 (3%) |
|  | high dose | 249/1228 (20%) | 187/990 (19%) |
|  | other | 39/1228 (3%) | 26/990 (3%) |
|  | monoclonal antibodies | 17 /1228 (1%) | 17/990 (2%) |
| Infections | At least one | 460/1298 (36%) | 354/1046 (34%) | 0.458 |
| Only one | 384/1298 (30%) | 299/1046 (29%) | 0.548 |
| Two | 60/1298 (5%) | 39/1046 (4%) | 0.297 |
| Three | 16/1298 (1%) | 16/1046 (2%) | 0.596 |
| Bacteremia* |  | 87/460 (19%) | 46/354 (13%) | 0.108 |
| Pneumonia* |  | 89/460 (19%) | 53/354 (15%) | 0.133 |
| ICU treatment because of infection |  | 32/460 (7%) | 24/354 (7%) | 0.652 |
| Response to therapy >= VGPR |  | 371/1298 (29%) | 288/1046 (27%) | 0.574 |
| ORR (>=PR) |  | 932/1298 (72%) | 743/1046 (71%) | 0.387 |

*main diagnosis
